# Supplementary material for: Enhanced base editing by co-expression of free uracil DNA glycosylase inhibitor
Source: PubMed Central journal article supplement (PMC5630677; doi:10.1038/cr.2017.111), 2017-08-29
Supplement: cr2017111x6.pdf [file cr2017111x6.pdf]

## **MATERIALS AND METHODS**

### **Plasmid construction**

pCMV-BE3 was obtained from Addgene (cat. no. 73021). A UGI-deleted fragment was PCR amplified by high-fidelity DNA polymerase PrimeSTAR HS (Clontech) from pCMV-BE3 with the primer set (T2A-FOR-1/BE3- $\Delta$ UGI-R) and then fused to Nhe I/Pme I linearized pCMV-BE3 by ClonExpress® Entry One Step Cloning Kit (Vazyme) to generate the BE3- $\Delta$ UGI expressing vector pCMV-BE3- $\Delta$ UGI. UGI sequence was PCR amplified from pCMV-BE3 with the primer set (pc3.1-UGI-F/pc3.1-UGI-NLS-R) and then fused to BamH I/EcoR I linearized pcDNA3.1(+) to generate the UGI expressing vector pUGI-NLS. Oligonucleotides containing 3 $\times$ Flag (pcDNA3.1-3 $\times$ Flag-FOR/pcDNA3.1-3 $\times$ Flag-REV) were annealed and fused to BamH I/EcoR I linearized pcDNA3.1(+) to generate pcDNA3.1-3 $\times$ Flag. UGI-NLS sequence was PCR amplified from pUGI-NLS with the primer set (pc3.1-UGI-F/pc3.1-UGI-NLS-3Flag-R) and then fused to EcoR I linearized pcDNA3.1-3 $\times$ Flag to generate another UGI expressing vector pUGI-NLS-3 $\times$ Flag. A fragment containing Apa I/Pme I sites was amplified from pCMV-BE3 with the primer set (T2A-FOR-1/PmeI-ApaI-R) and then fused to Nhe I/PmeI linearized pCMV-BE3 to generate pCMV-BE3AP. Two fragments were amplified from pCMV-BE3 with the primer sets (T2A-FOR-1/T2A-REV-1-NEW, T2A-FOR-2/T2A-REV-2) and then fused to Nhe I/Pme I linearized pCMV-BE3 to generate pCMV-BE3T, which contains one copy of 2A-UGI sequence. The 2A-UGI sequence was then amplified from pCMV-BE3T with the primer set (ApaI-1T2AUGI-F/PmeI-1T2AUGI-R) and then ligated into the Apa I/Pme I sites of pCMV-BE3AP to generate the eBE-S1 expression vector pCMV-eBE-S1. A DNA fragment (3 $\times$ 2AUGI) containing three copies of 2A-UGI

was synthesized (GenScript), amplified with the primer set (ApaI-1T2AUGI-F/PmeI-3T2AUGI-R) and then ligated into the Apa I/Pme I sites of pCMV-BE3AP to generate the eBE-S3 expression vector pCMV-eBE-S3. Oligonucleotides containing sgRNA target sites were annealed and ligated into the BsaI sites of pGL3-U6-sgRNA-PGK-Puro (from Dr. Xingxu Huang's lab) to generate sgRNA-expressing vectors. Inserted sequences in expression plasmids were all validated by Sanger sequencing. The sequences of the oligos used for plasmid construction were listed in Supplementary Table 3.

### **Cell culture and transfection**

293FT and HeLa cells from ATCC were maintained in DMEM (10566, Gibco/Thermo Fisher Scientific) + 10% FBS (16000-044, Gibco/Thermo Fisher Scientific) and have been tested to exclude mycoplasma contamination. Cells were seeded in a 6-well plate at a density of  $6 \times 10^5$  per well and transfected with 500  $\mu$ l serum-free Opti-MEM that contained 12  $\mu$ l Lipofectamine<sup>TM</sup> 2000 (Thermo Fisher Scientific), 2.5  $\mu$ g pCMV-BE3 (pCMV-eBE-S1 or pCMV-eBE-S3), 1.6  $\mu$ g sgRNA-expressing plasmid without or with 50 (low), 100 (medium), or 200 (high) ng pUGI-NLS (Figure S3B). For Western blot analysis only, cells were transfected without or with 50 (low), 100 (medium), or 200 (high) ng pUGI-NLS-3 $\times$ Flag (Figure S3A) to indicate the increased UGI expression at its protein level on different transfection conditions (Figure S3B). After 24 hr, puromycin (ant-pr-1, InvivoGen) was added to the media at the final concentration of 1  $\mu$ g/ml. After another 48 hr, the genomic DNA was extracted from the cells with QuickExtract<sup>TM</sup> DNA Extraction Solution (QE09050, Epicentre) or the cells were lysed in 2 $\times$  SDS loading buffer for western blot.

## **Antibodies**

Primary antibodies were purchased from the following sources: against alpha-tubulin (T6199), against flag-tag (M2, F1804) for western blot - Sigma. Second antibodies were purchased from the following sources: horseradish peroxidase-conjugated goat anti-mouse (115-035-146) for western blot - Jackson ImmunoResearch.

## **Western blotting analysis**

Protein samples were incubated at 95 °C for 20 min, separated by SDS-PAGE in sample loading buffer and proteins were transferred to PVDF membranes (Thermo Scientific Pierce). After blocking with TBST (25 mM Tris pH 8.0, 150 mM NaCl, and 0.1% Tween 20) containing 5% (w/v) nonfat dry milk for 2h, the membrane was reacted overnight with indicated primary antibody. After extensive washing, the membranes were reacted with HRP-conjugated secondary antibodies for 1h. Reactive bands were detected by ECL (Thermo Scientific Pierce), and scanned by Amersham Imager 600.

## **RNA extraction, reverse transcription and quantitative PCR (RT-qPCR)**

Total RNAs were extracted with the TransZol® Up Plus RNA Kit (TransGen, Beijing, China) according to the manufacture's instructions and reversely transcribed with cDNA Synthesis SuperMix (TransGen) according to the manufacture's instructions. Total RNA (2 µl at 500 ng/µl), 1 µl random hexamer DNA primers (0.1 µg/µl) and 5 µl nuclease-free water were heated at 65°C for 10 min and immediately put on ice, and then the reverse transcription mixture containing 10 µl 2 × TS Reaction Mix, 1 µl DNA remover, 1 µl TransScript Reverse Transcriptase/Ribonuclease Inhibitor Enzyme Mix was added. The

reactions were incubated at 25°C for 10 min, 42°C for 30 min and finally 85°C for 5 sec to inactivate the enzymes. The reactions were diluted with 80 µl of nuclease-free water. qPCR was performed with the primer set for APOBEC1 (APOBEC1-T1F: CCATGCGGCGAATGTAGTA/APOBEC1-T1R: GGCTTCATTACTCGGGCTATAA), for UGI (UGI-T1F: AGCAACTGGTTATCCAGGAATC/UGI-T1R: GTCGCTAGTCAGAAGCATGAC), for GAPDH (hGAPDH-QF: CATCAATGGAAATCCCATCA/hGAPDH-QR: TTCTCCATGGTGGTGAAGAC) and TransStart Green qPCR SuperMix (Transgen); or with the primer set for UGI\_ isoform-B (UGI\_B-T1F: AGAACCTGGACCTACCAA/UGI\_B-T1R: TTGTTGCCGATCACTTCCTC/UGI\_B-probe: 5'(6-FAM)-TGAGAAAGAGACCGGCAAACAGCT-3'(TAMRA)), for UGI\_ isoform-C (UGI\_C-T1F: TCTTATGTTGCCTGAGGAAGTC/UGI\_C-T1R: CGCCCATGGTTTGTACTCT/UGI\_C-probe: 5'(6-FAM)-ACCGCTTACGATGAGTCCACAGATG-3'(TAMRA)) and TransStart Probe qPCR SuperMix (Transgen) according to the instruction.

### **DNA library preparation and sequencing**

Target genomic sequences were PCR amplified by high-fidelity DNA polymerase PrimeSTAR HS (Clontech) with primers flanking each examined sgRNA target site. The sgRNA target sites and PCR primers used to amplify target genomic sequences were listed in Supplementary Table 4. Indexed DNA libraries were prepared by using the TruSeq ChIP Sample Preparation Kit (Illumina) with some minor modifications. Briefly, the PCR products amplified from genomic DNA regions were fragmented by Covaris S220. The fragmented DNAs were then PCR amplified by using the TruSeq ChIP Sample

Preparation Kit (Illumina). After quantitated with Qubit High-Sensitivity DNA kit (Invitrogen), PCR products with different tags were pooled together for deep sequencing by using the Illumina HiSeq 2500 (1×100), HiSeq X-10 (2×150) or NextSeq 500 (2X150) at CAS-MPG Partner Institute for Computational Biology Omics Core, Shanghai, China. Raw read qualities were evaluated by FastQC (<http://www.bioinformatics.babraham.ac.uk/projects/fastqc/>). For paired end sequencing, only R1 reads were used. Adaptor sequences and read sequences on both ends with Phred quality score lower than 30 were trimmed. Trimmed reads were then mapped with the BWA-MEM algorithm (BWA v0.7.9a) to target sequences. After piped up with samtools (v0.1.18), indels and base substitutions were further calculated.

### **Indel frequency calculation**

Indels were estimated in the aligned regions spanning from upstream eight nucleotides to the target site to downstream 19 nucleotides to PAM sites (50 bp). Indel frequencies were subsequently calculated by dividing reads containing at least two inserted and/or deleted nucleotides by all the mapped reads at the same region. Counts of indel-containing reads and total mapped reads are listed in Supplementary Table 1. Indel frequencies were calculated by dividing indel-containing reads by total mapped reads.

### **Base substitution calculation**

Base substitutions were selected at each position of the examined sgRNA target sites that mapped with at least 500 independent reads, and obvious base substitutions were only observed at the targeted base editing sites. Counts of reads for each base and total reads

are listed in Supplementary Table 2. Base substitution frequencies were calculated by dividing base substitution reads by total reads. For each sgRNA, the ratio of C-to-T base substitution over indel was calculated by dividing the sum of C-to-T base substitution frequencies at all editing sites by the indel frequency of 50-bp region around sgRNA target site (from upstream eight nucleotides to the target site to downstream 19 nucleotides to PAM sites).

## Data Availability

Deep sequencing data can be accessed at the NCBI Gene Expression Omnibus (accession no: GSE98685, <https://www.ncbi.nlm.nih.gov/geo/query/acc.cgi?acc=GSE98685>).

## DNA Sequence

### pCMV-BE3-ΔUGI

```
ATGAGCTCAGAGACTGGCCAGTGGCTGTGGACCCACATTGAGACGGCGGATCGAGCCCCATGAGTTGAGGTATTCTTCGATCCGAGA
GAGCTCCGCAAGGAGACCTGCCTGCTTTACGAAATTAATTGGGGGGCCGGCACTCCATTTGGCGACATACATCACAGAACACTAACAA
CACGTCGAAAGTCAACTTCATCGAGAAGTTCACGACAGAAAGATATTTCTGTCCGAACACAAGGTGCAGCATTACCTGGTTTCTCAGCTGG
AGCCCATGCGGGCAATGTAGTAGGGCCATCACTGAATTCCTGTCAAGGTATCCCCACGTCACTCTGTTTATTTACATCGCAAGGCTGTAC
CACCACGCTGACCCCGCAATCGACAAGGCCTGCGGGATTGATCTCTTCAGGTGTGACTATCCAAATTTGACTGAGCAGGAGTCAAGGA
TACTGTGGAGAAAATTTGTGAATTATAGCCGAGTAATGAAGCCCACTGGCCTAGGTATCCCCATCTGTGGGTACGACTGTACGTTCTT
GAAGTGTACTGCATCATACTGGGCTGCCTCCTTGTCTCAACATTCTGAGAAGGAAGCAGCCACAGCTGACATTTTACCATCGCTCTT
CAGTCTTGTCTATTACCAGCGACTGCCCCACACATTCTCTGGGCCACCGGTTGAAAagcggcagcgagactccccgggacctcagagtcgccacaccg
aaagtGATAAAAAGTATTCTATTGGTTTAGCCATCGGCACTAATTCGGTTGGATGGGCTGTCATAACCGATGAATACAAAAGTACCTTCAAA
GAAATTTAAGGTGTGGGGAACACAGACCGTCATTCGATTA AAAAGAATCTTATCGGTGCCCTCCTATTCGATAGTGGCGAAAACGGCAG
AGGGCACTCGCCTGAAACGAACCGCTCGGAGAAGGTATACACGTGCAAGAACC GAATATGTTACTTACAAGAAAATTTT TAGCAATGAG
ATGGCCAAAAGTTGACGATTTCTTTCTTCCAGGTTTGAAGAGTCTTCTCTGTGCGAAGAGGACAAGAAACATGAACGGCACCCCATCTTT
GGAAACATAGTAGATGAGGTGGCATATCATGAAAAGTACCCAACGATTTATCACCTCAGAAAAAAGCTAGTTGACTCAACTGATAAAGC
GGACCTGAGGTTAATCTACTTGGCTCTTGCCATATGATAAAGTTCCTGCGGCACTTTCTCATTGAGGGTGATCTAAATCCGGACAACCTC
GGATGTCGACAAAAGTTCATCCAGTTAGTACAAAACCTATAATCAGTTGTTTGAAGAGAACCTATAAATGCAAGTGGCGTGGATGCGA
AGGCTATTCTTAGCGCCGCTCTCTAAATCCCGACGGCTAGAAAACCTGATCGCACAAATTACCCGGAGAGAAGAAAAATGGGTTGTTTCG
GTAACCTTATAGCGCTCTCACTAGGCCTGACACCAAATTTTAAAGTGAACCTTCGACTTAGCTGAAGATGCCAAATTCGAGCTTAGTAAGG
ACACGTACGATGACGATCTCGACAATCTACTGGCACAATTTGGAGATCAGTATGCGGACTTATTTTGGCTGCCAAAAACCTTAGCGATG
CAATCCTCCTATCTGACATACTGAGAGTTAATACTGAGATTACCAAGGCGCCGTTATCCGCTTCAATGATCAAAAAGGTACGATGAACATC
ACCAAGACTTGACACTTCTCAAGGCCCTAGTCCGTGAGCAACTGCCTGAGAAATATAAGGAAATATTCTTTGATCAGTCGAAAAACGGGT
ACGCAGGTTATATTGACGGCGGAGCGAGTCAAGAGGAATTTACAAGTTTATCAAACCCATATTAGAGAAGATGGATGGGACGGAAGAG
TTGCTTGTAAAACCTCAATCGCGAAGATCTACTGCGAAAAGCAGCGGACTTTCGACAACGGTAGCATTCCACATCAAATCCACTTAGGCGAA
TTGCATGCTATACTTAGAAGGCAGGAGGATTTTATCCGTTCTCAAAGACAATCGTGAAAAGATTGAGAAAATCTAAACCTTTCGCAT
ACCTTACTATGTGGGACCCCTGGCCGAGGGAACCTCGGTTCCGATGGATGACAAGAAAGTCCGAAGAAACGATTACTCCATGGAATTT
TGAGGAAGTTGTCGATAAAGGTGCGTCAGCTCAATCGTTTCATCGAGAGGATGACCAACTTTGACAAGAATTTACCGAAGAAAAGTAT
TGCCTAAGCACAGTTTACTTTACGAGTATTTACAGTGTACAATGAACCTCACGAAAGTTAAGTATGTCACTGAGGGCATGCGTAAACCCG
CCTTTCTAAGCGGAGAACAGAAGAAAGCAATAGTAGATCTGTTATTCAAGACCAACCGCAAAGTGACAGTTAAGCAATTTGAAAGAGGAC
TACTTTAAGAAAATGAAATGCTTCGATTCTGTGAGATCTCCGGGTAGAAGATCGATTTAATGCGTCACTTGGTACGTATCATGACCTC
```

CTAAAGATAATTAAGATAAGGACTTCCTGGATAACGAAGAGAATGAAGATATCTTAGAAGATATAGTGTGACTCTTACCCTCTTTGA  
AGATCGGGAAATGATTGAGGAAAGACTAAAAACATACGCTCACCTGTTGCGACGATAAAGGTTATGAAACAGTTAAAGAGGCGTGCCTATA  
CGGGCTGGGGACGATTGTCGCGGAAACTTATCAACGGGATAAGAGACAAGCAAAGTGGTAAAACATTTCTCGATTTTCTAAAGAGCGAC  
GGCTTCGCCAATAGGAACTTTATGCGCTGATCCATGATGACTCTTAACTTCAAAGGGATATACAAAAGGCACAGGTTTCCGGACAA  
GGGACTCATTGACGAAACATATTGCGAATCTTGGTGGTTCCGCGAGCCATCAAAAAGGGCATACTCCAGACAGTCAAAGTAGTGGATGAG  
CTAGTTAAGGTCATGGGACGTCACAAAACCGGAAAACATTGTAATCGAGATGGCACGCGAAAATCAAACGACTCAGAAGGGGCAAAAAA  
CAGTCGAGAGCGGATGAAGAGAATAGAAGAGGGTATTAAGAACTGGGCAGCCAGATCTTAAAGGAGCATCTGTGGAAAAATACCAAT  
TGCAGAACGAGAACTTTACCTCTATTACCTACAAAATGGAAGGGACATGTATGTTGATCAGGAACTGGACATAAACCGTTTATCTGAT  
TACGACGTCGATCACATTGTACCCCAATCCTTTTTGAAGGACGATTCAATCGACAATAAAGTGCTTACACGCTCGGATAAGAACCGAGGG  
AAAAGTGACAATGTTCCAAGCGGAGGAAGTCGTAAGAAAATGAAGAACTATTGGCGGACGCTCCTAAATGCGAACTGATAACGCAAAG  
AAAGTTTCGATAAAGCTTAAAGCTGAGAGGGGTGGCTTGTCTGAACTTGACAAGGCCGATTATTAACGTCAGCTCGTGGAAACCC  
GCCAAATCACAAGCATGTTGCACAGATACTAGATTCCCGAATGAATACGAAATACGACGAGAACGATAAGCTGATTCCGGAAAGTCAA  
GTAATCACTTTAAAGTCAAATTTGGTGTGGACTTCAGAAAAGGATTTTCAATTTCTATAAAGTTAGGGAGATAAAATACTACCACATGC  
GCACGACGCTTATCTTAATGCCGTCGTAGGGACCGCACTCATTAAGAAATACCCGAAGCTAGAAAAGTGAAGTTGTGTATGGTATTACA  
AAGTTTATGACGTCGTAAGATGATCGCGAAAAGCGAACAGGAGATAGGCAAGGCTACAGCCAAATACTTCTTTTATTCTAACATTATG  
AATTTCTTAAAGCGGAAATCACTCTGGCAAACGGAGAGATACGCAAACGACCTTAAATGAAACCAATGGGGAGACAGGTGAAATCGT  
ATGGGATAAAGGGCCGGACTTCGCGACGGTGAGAAAAGTTTGTCCATGCCCAAGTCAACATAGTAAAGAAAACGAGGTGCAGACCG  
GAGGGTTTTCAAAGGAATCGATTCTTCAAAAAGGAATAGTGATAAGCTCATCGCTCGTAAAAAGGACTGGGACCCGAAAAAGTACGGT  
GGCTTCGATAGCCCTACAGTTGCTTATTCTGTCTAGTAGTGGCAAAAAGTTGAGAAGGGAAAATCCAAGAACTGAAGTCAGTCAAAGA  
ATTATTGGGGATAACGATTATGGAGCGCTCGTCTTTTAAAAGAACCCCATCGACTTCTTGAGCGGAAAGGTTACAAGGAAGTAAAA  
AGGATCTCATAATTAAGTACCAAAGTATAGTCTGTTTGGAGTTAGAAAATGGCCGAAAACGGATGTTGGCTAGCGCCGGAGAGCTTCAA  
AAGGGAAACGAACCTGCCTACCGTCTAAATACGTGAATTTCTGTATTTAGCGTCCATTACGAGAAGTTGAAAGGTTACCTGAAGAT  
AACGAACGAAAGCAACTTTTGTGAGCAGCACAACATATCTCGACGAAATCATAGAGCAAATTTCCGAATTCAGTAAGAGAGTCAT  
CCTAGCTGATGCCAATCTGACAAAAGTATTAAGCGCATAACAACAGCACAGGGATAAACCCATACGTGAGCAGGCGGAAAATATTATCC  
ATTTGTTTACTCTTACCAACCTCGGCGCTCCAGCCGATTCAGTATTTTACACAACGATAGATCGCAAACGATACACTTCTACCAAGG  
AGGTGCTAGACGCGACACTGATTCACCAATCCATCACGGATTATATGAAACTCGGATAGATTGTACAGCTTGGGGGTGACtctgtggtt  
ctCCAAGAAGAAGAGGAAAGTCTGA

pUGI-NLS:

**ATGACTAATCTGTGAGATATTATTGAAAAGGAGACCGGTAAGCAACTGGTTATCCAGGAATCCATCCTCATGCTCCAGAGGAGGTGGA  
AGAAGTCATTGGGAACAAGCCGAAAGCGATATACTCGTGCACACCGCTACGACGAGAGCACCGACGAGAATGTCATGCTTCTGACTAG  
CGAGCCCTGAATACAAGCCTTGGGCTCTGGTCATACAGGATAGCAACGGTGAGAACAAGATTAAGATGCTCCCAAGAAGAAGAGGA  
AAGTCTAG**

pUGI-NLS-3×Flag:

**ATGACTAATCTGTGAGATATTATTGAAAAGGAGACCGGTAAGCAACTGGTTATCCAGGAATCCATCCTCATGCTCCAGAGGAGGTGGA  
AGAAGTCATTGGGAACAAGCCGAAAGCGATATACTCGTGCACACCGCTACGACGAGAGCACCGACGAGAATGTCATGCTTCTGACTAG  
CGAGCCCTGAATACAAGCCTTGGGCTCTGGTCATACAGGATAGCAACGGTGAGAACAAGATTAAGATGCTCCCAAGAAGAAGAGGA  
AAGTCGACTACAAAGACCATGACGGTGATTATAAAGATCATGACATCGATTACAAGGATGACGATGACAAGTAG**

pCMV-eBE-S1:

**ATGAGCTCAGAGACTGGCCAGTGGCTGTGGACCCACATTGAGACGGCGGATCGAGCCCATGAGTTTGGAGTATTCTTCGATCCGAGA  
GAGCTCCGAAGGAGACCTGCCTGCTTACGAAATTAATTGGGGGGCCGCACTCCATTGGCGACATACATCAGAACACTAACAAAG  
CACGTCGAAGTCAACTTCATCGAGAAGTTCACGACAGAAAGATTTCTGTCCGAACACAAGGTGCAGCATTACCTGGTTTCTCAGCTGG  
AGCCATGGCGGAATGTAGTAGGGCCACTGAATTCCTGTCAAGGTATCCCACTGCTACTCTGTTTATTTACATCGCAAGGCTGTAC  
CACCACGCTGACCCCGCAATCGACAAGCCCTCGGGATTGATCTCTTCAAGTGTGACTATCCAAATTTAGACTGAGCAGGAGTCAGGA  
TACTGCTGGAGAACTTTGTGAATATAGCCCGAGTAATGAAGCCACTGGCTAGGTATCCCCATCTGTGGGTACGACTGTACGTTCTT  
GAACTGTACTGCATCATACTGGGCTGCCTCCTTGTCTCAACATTCTGAGAAGGAAGCAGCCACAGCTGACATTTTACCATCGCTCTT  
CAGTCTTGTCTATTACCAGGACTGCCCCACACATTTCTTGGGCCACCGGTTGAAAagcggcagcgagactccgggacctcagagtccgccacccg  
aaagtGATAAAAAGTATTCTATTGGTTTAGCCATCGGCACTAATTCGGTTGGATGGGCTGTCTATAACCGATGAATACAAAGTACCTTCAA  
GAAATTTAAGGTGTTGGGAACACAGACCGCTCATTCGATTAAGAAATCTTATCGGTGCCCTCCTATTCGATAGTGGCGAAACGGCAG  
AGGCGACTCGCCTGAAAACGAACCGCTCGGAGAAGGTATACACGTCGCAAGAACCGAATATGTTACTTACAAGAAAATTTTAGCAATGAG  
ATGGCCAAAGTTGACGATTCTTTCTTTACCCTTTGGAAAGTCTTCTTGTGCAAGAGGACAAGAAACATGAACGGCACCCCATCTTT  
GAAACATAGTAGATGAGTGGCATATCATGAAAAGTACCAACGATTTATCACCTCAGAAAAAGCTAGTTGACTCAACTGATAAAGC**

GGACCTGAGGTTAATCTACTTGGCTCTTGCCCATATGATAAAGTTCCGTGGGCACCTTCTCATTGAGGGTGTACTAAATCCGGACAACCT  
GGATGTCGACAAACTGTTTCATCCAGTTAGTACAAACCTATAATCAGTTGTTTGAAGAGAACCTTATAAATGCAAGTGGCGTGGATGCGA  
AGGCTATTTCTAGCGCCCGCTCTCTAAATCCCGACGGCTAGAAAACCTGATCGCACAATTACCCGGAGAGAAGAAAAATGGGTTGTTCCG  
GTAACCTTATAGCGCTCTACTAGGCTGACACCAAAATTTAAGTCGAACCTCGACTTAGCTGAAGATGCCAAATTCGAGCTTAGTAAGG  
ACACGTACGATGACGATCTCGACAATCTACTGGCACAAATTTGGAGATCAGTATGCGGACTTATTTTTGGCTGCCAAAAACCTTAGCGATG  
CAATCCTCTATCTGACATACTGAGAGTTAATACTGAGATTACCAAGGCGCCGTTATCCGCTTCAATGATCAAAAGGTACGATGAACATC  
ACCAAGACTTGACACTTCTCAAGGCCCTAGTCCGTCAGCAACTGCCTGAGAAATATAAGGAAATATTTCTTTGATCAGTCGAAAAACGGGT  
ACGCAGGTTATATGACGGCGGAGCGAGTCAAGAGGAATTTCTACAAGTTTATCAAACCCATATTAGAGAAGATGGATGGACGGAAGAG  
TTGCTTGTA AAAACTCAATCGCGAAGATCTACTGCGAAAGCAGCGGACTTTGACAACGGTAGCATTCCACATCAAATCCACTTAGGCGAA  
TTGCATGCTATACTTAGAAGGCAGGAGGATTTTTATCCGTTCCCTCAAAGACAATCGTGA AAAAGATTGAGAAAATCCTAACCTTTCCGAT  
ACCTTACTATGTGGGACCCTGGCCCGAGGGAACCTCCTGGTTCGCATGGATGACAAGAAAAGTCCGAAGAAAAGATTACTCCATGGAATTT  
TGAGGAAGTTGTCGATAAAGGTGCGTCAGCTCAATCGTTCATCGAGAGGATGACCAACTTTGACAAGAATTTACCGAACGAAAAAGTAT  
TGCCTAAGCACAGTTTACTTTACGAGTATTTACAGTGTACAATGAACTCACGAAAGTTAAGTATGTCAGTGGGCGATGCGTAAACCCG  
CCTTTCTAAGCGGAGAACAAGAAAAGCAATAGTAGATCTGTTATTCAAGACCAACCGCAAAGTGACAGTTAAGCAATTTGAAAGAGGAC  
TACTTTAAGAAAATGAAATGCTTCGATTTCTGTCGAGATCTCCGGGTAGAAGATCGATTTAATGCGTCACTTGGTACGTATCATGACCTC  
CTAAAGATAATTAAGATAAGGACTTCTTGATAACGAAGAGAATGAAGATATCTTAGAAGATATAGTGTGACTTTACCTCTTTTGA  
AGATCGGGAATGATTGAGGAAAGACTAAAAACATACGCTCACCTGTTTCGACGATAAAGTTATGAAAACAGTTAAAGAGGCGTGCCTATA  
CGGGCTGGGACGATTGTCGCGGAAAACCTTATCAACGGGATAAGAGACAAGCAAAGTGGTAAAACTATTCTCGATTTTCTAAAGAGCGAC  
GGCTTCGCCAATAGGAACCTTTATGACGCTGATCCATGATGACTCTTAACTTCAAAGAGGATATACAAAAGGCACAGGTTTCCGGACAA  
GGGACTCATTGACGAAACATATTGCGAATCTTGTCTGCTCCAGCCATCAAAAAGGGCATACTCCAGACAGTCAAAGTAGTGGATGAG  
CTAGTTAAGGTCATGGGACGTCACAAAACCGGAAAACATTGTAATCGAGATGGCACGCGAAAAATCAAACGACTCAGAAGGGGCAAAAAA  
CAGTCGAGAGCGGATGAAGAAATAGAAGAGGTTAAGAAGTGGGACGCGAGATCTTAAAGGAGCATCCTGTGGAAAAATACCAAT  
TGCAAGACGAGAAAACCTTACTCTAATACCTACAAAATGGAAGGGACATGTATGTTGATCAGGAACTGGACATAAACCCGTTTATCTGAT  
TACGACGTCGATCACATTTGACCCCAATCCTTTTTGAAGGACGATTTCAATCGACAATAAAGTGCTTACACGCTCGGATAAGAACCGAGGG  
AAAAGTGACAATGTTCAAAGCGAGGAAGTCGTAAGAAAATGAAGAACTATTGGCGGCAGCTCCTAAATGCGAACTGATAACGCAAG  
AAAGTTCGATAACTTAACTAAAGCTGAGAGGGGTGGCTTGTCTGAACTTGACAAGGCCGATTTATTAACGTCAGCTCGTGGAAACCC  
GCCAAATCACAAGCATGTTGCACAGATACTAGATTTCCCGAATGAATACGAAATACGACGAGAACGATAAGCTGATTCGGGAAGTCAAA  
GTAATCACTTTAAAGTCAAATTTGGTGTGCGACTTCAGAAAAGTTTCAATTTCTATAAAGTTAGGGAGATAAAATACTACCACCATGC  
GCACGCGCTTATCTTAATGCCGTCTGAGGACCGCACTCATTAAAGAAATACCCGAAGCTAGAAAAGTGAGTTTGTGTATGGTGATTACA  
AAGTTTATGACGTCGTAAGATGATCGCGAAAAGCGAACAGGAGATAGGCAAGGCTACAGCCAAATACTTCTTTTATTCTAACATTATG  
AATTTCTTAAAGACGGAATCACTCTGGCAAACGGAGAGATACGCAAACGACCTTTAATTTGAAACCAATGGGGAGACAGGTGAAATCGT  
ATGGGATAAGGGCCGGACTTTCGCGACGGTGAGAAAAGTTTGTCCATGCCCAAAGTCAACATAGTAAAGAAAACCTGAGGTGCAGACCG  
GAGGGTTTTCAAAGGAATCGATTTCTCCAAAAAGGAATAGTGATAAGCTCATCGCTCGTAAAAAGGACTGGGACCCGAAAAAGTACGGT  
GGCTTCGATAGCCCTACAGTTGCTTCTGTCCTAGTAGTGGCAAAAGTTGAGAAGGAAAAATCCAAGAACTGAAGTCAGTCAAAGA  
ATTATTGGGATAAACGATTATGGAGCGCTCGTCTTTTTGAAAAGAACCCCTCAGACTTCTTGGAGCCGAAAAGTTACAAGAAAGTAAAAA  
AGGATCTCATAATTAACCTACCAAAGTATAGTCTGTTTGGAGTTAGAAAATGGCCGAAAACGGATGTTGGCTAGCGCCGGAGAGCTTCAA  
AAGGGGAACGAACTCGCACTACCGTCTAAATACGTGAATTTCTGTATTTAGCGTCCCATACGAGAAGTTGAAAGGTTACCTGAAGAT  
AACGAACAGAAGCAACTTTTTGTGAGCAGCACAAAACATATCTCGACGAAATCATAGAGCAAATTTCCGGAATTCAGTAAGAGAGTCAT  
CCTAGCTGATGCCAATCTGACAAAAGTATTAAGCGCATAACAACAGCACAGGGATAAACCCATACGTGAGCAGGCGGAAAAATATTATCC  
ATTTGTTTACTCTTACCAACCTCGCGCTCCAGCCGATTCAGTATTTTGACACAACGATAGATCGCAAACGATACACTTCTACCAAGG  
AGGTGCTAGACGCGCACTGATTCACCAATCCATCACGGGATTATATGAAAACCTCGGATAGATTGTCACAGCTTGGGGGTGACTctggtggtt  
ctACTAATCTGTGAGATATTATTGAAAAGGAGACCGGTAAGCAACTGGTTATCCAGGAATCCATCCTCATGCTCCAGAGGAGGTGGAAG  
AAGTCATTGGGAACAAGCCGAAAGCGATATACTCGTGCACACCGCCTACGACGAGACACCGAGAGAATGTCATGCTTCTGACTAGCG  
ACGCCCTGAATACAAGCCTTGGGCTCTGGTCATACAGGATAGCAACGGGTGAGAACAAGATTAGATGCTCctggtggttctCCCAAGAAAG  
AGAGGAAAGTcgggcccGAGGGCAGAGGAAGTCTGCTAACATCGCGGTGACGTCGAGGAGAATCCTGGCCCAACTAATCTGTGAGATATTAT  
TGAAAAGGAGACCGGTAGCAACTGGTTATCCAGGAATCCATCCTCATGCTCCAGAGGAGGTGGAAGAAGTCAATGGGAACAAGCCGG  
AAAGCGATATACTCGTGCACACCGCCTACGACGAGAGCACCGCAGAGAATGTCATGCTTCTGACTAGCAGCCCTGAATACAAGCCCT  
GGGCTCTGGTCATACAGGATAGCAACGGTGAGAACAAGATTAAGATGCTCctggtggttctCCCAAGAAAGAGAGGAAAGTCTAA

pCMV-eBE-S3:

**ATG**AGCTCAGAGACTGGCCAGTGGCTGTGGACCCACATTTAGACGGCGGATCGAGCCCATGAGTTTGGAGTATTCTTCGATCCGAGA  
GAGCTCCGCAAGGAGACCTGCCTGTACGAAATTAATTTGGGGGGCCGGCACTCCATTTGGCGACATACATCACAGAACACTAACAG  
CAGCTCGAAGTCAACTTCATCGAGAAGTTCAGCAGAGAAAGATATTTCTGTCCGAACACAAGGTGCAGCATTACCTGTTTTCTCAGCTGG  
AGCCCATGGCGGAATGTAGTAGGGCCATCACTGAATTCCTGTCAAGGTATCCCACTCACTCTGTTTTATTACATCGCAAGGCTGTAC  
CACCACGCTGACCCCGCAATCGACAAGCCCTGCGGGATTGATCTTTCAGGTGTACTATCCAAATTTACTGACTGAGCAGGAGTACGGA  
TACTGCTGGAGAACTTTGTGAATATAGCCCGAGTAATGAAGCCCACTGGCCTAGGTATCCCATCTGTGGGTACGACTGTACGTTCTT  
GACTGTACTGCATCACTAGTGGCCCTGCCTCTTGTCTCAACATTTCTGAGAAGGAAGCAGCCACAGCTGACATTTTACCATCGCTCTT  
CACTTTGTCATTACAGCGACTGCCCCACACATTTCTGGCCCAACCGGTTGAAAagcggcagcgagactccgggacctagagtcgcccaccccg  
aaagtGATAAAAAGTATTCTATTGGTTTAGCCATCGGCACTAATTTCCGTTGGATGGGCTGTCATAACCGATGAATACAAGTACCTTCAA  
GAAATTTAAGGTGTTGGGGAACACAGACCGTCAATTCGATTA AAAAGAACTTATCGGTGCCCTCCTATTGATAGTGGGAAACGGCAG  
AGGCGACTGCCTGAAACGAACCGCTCGGAGAAGGTATACAGCTCGCAAGAACCGAATATGTTACTTACAAGAAATTTTTAGCAATGAG



ATGGCCAAAGTTGACGATTCTTTCTTTCCACCGTTTGGAAAGAGTCCTTCTTGTGCGAAGAGGACAAGAAACATGAACGGCACCCCATCTTT  
GGAAACATAGTAGATGAGGTGGCATATCATGAAAAGTACCCAACGATTTATCACCTCAGAAAAAAGCTAGTTGACTCAACTGATAAAGC  
GGACCTGAGGTTAATCTACTTGGCTCTTGCCCATATGATAAAGTTCCGTGGGCACCTTTCTCATTGAGGGTGATCTAAATCCGGACAACCTC  
GGATGTCGACAAACTGTTATCCAGTTAGTACAAACCTATAATCAGTTGTTTGAAGAGAACCCTATAAATGCAAGTGGCGTGGATCGCA  
AGGCTATTCTTAAGCGCCCGCTCTAAATCCCGACGGTGTAGAAAACCTGATCGCACAATTACCCGGAGAGAAAGAAAAATGGGTTGTTTCG  
GTAACCTTATAGCGCTCTCACTAGGCTGACACCAAATTTTAAAGTGAACCTCGACTTAGCTGAAGATGCCAAATTCGAGCTTAGTAAGG  
ACACGTACGATGACGATCTCGACAATCTACTGGCACAATTTGGAGATCAGTATGCGGACTTATTTTTGGCTGCCAAAAACCTTAGCGATG  
CAATCCTCCTATCTGACATACTGAGAGTTAATACTGAGATTACCAAGGCGCCGTTATCCGCTTCAATGATCAAAAGGTACGATGAACATC  
ACCAAGACTTGACACTTCTCAAGGCCCTAGTCCGTGAGCAACTGCCTGAGAAAATATAAGGAAATATTTCTTTGATCAGTCGAAAAACGGGT  
ACGCAGGTTATATTGACGGCGGAGCGAGTCAAGAGGAATTTACAAGTTTATCAAACCCATATTAGAGAAGATGGATGGGACGGAAGAG  
TTGCTTTGAAAACTCAATCGCGAAGATCTACTGCGAAAAGCAGCGGACTTTCGACAACGGTAGCATTCCACATCAAATCCACTTAGGCGAA  
TTGCATGCTATACTTAGAAGGCAGGAGGATTTTTATCCGTTCTCAAAGACAATCGTGAAGATTGAGAAAATCTAACCTTTTCGCAT  
ACCTTACTATGTGGACCCCTGGCCGAGGAACTCTCGTTTCGCATGGATGACAAGAAAGTCCGAAGAAACGATTACTCCATGGAATTT  
TGAGGAAGTTGTCGATAAAGGTGCGTCAGCTCAATCGTTTCATCGAGAGGATGACCAACTTTGACAAGAAATTTACCGAACGAAAAAGTAT  
TGCTAAGCACAGTTTACTTTACGAGTATTTACAGTGTACAATGAACCTCACGAAAGTTAAGTATGTCACTGAGGGCATGCGTAAACCCG  
CCTTTCTAAGCGGAGAACAAGAAAGCAATAGTAGATCTGTTATTTCAAGCAACCCGAAAAGTGACAGTTAAGCAATTTGAAGAGGAC  
TACTTTAAGAAAATTTGAATGCTTCGATTCTGTCGAGATCTCCGGGTGGAAGATCGATTAAATGCGTCACTTGTGATCATGACCTC  
CTAAAGATAAATTAAGATAAAGACTTCTGGATAACGAAGAGAATGAAGATATCTTAGAAGATATAGTGTGACTTTACCTCTTTGA  
AGATCGGAAAATGATTGAGGAAAGACTAAAAACATACGCTCACCTGTTTCGACGATAAAGTTATGAAACAGTTAAGAGGGCTGCTATA  
CGGGCTGGGACGATTGTCGCGAAAACCTATCAACGGGATAAGAGACAAGCAAAAGTGGTAAAACTATTCTCGATTTTCTAAAGACGGAC  
GGCTTCGCCAATAGGAACCTTATGTCAGCTGATCCATGATGACTCTTAAACCTTCAAAGAGGATATACAAAAGGCACAGGTTTCCGGACAA  
GGGACTCATTGACGAACATATTGCGAATCTGTGTTTCGCCAGCCATCAAAGGGCATACTCCAGACAGTCAAAGTAGTGGATGAG  
CTAGTTAAGGTCTATGGGACGTCACAAACCGGAAAACATTTGTAATCGAGATGGCCAGCGAAAAATCAAACGACTCAGAAGGGGCAAAAAA  
CAGTCGAGAGCGGATGAAGAGAATAGAAGAGGATTTAAAGAACTGGGCAGCCAGATCTTAAAGGAGCATCTGTGAAAAATACCAAT  
TGCAGAACGAGAACTTTACTCTATTACCTACAAAATGGAAGGACATGTATGTTGATCAGGAACTGGACATAAACCGTTTATCTGAT  
TACGACGTCGATCACATTTGACCCCAATCTTTTTGAAGGACGATTCAATCGACAATAAAGTGTTCACAGCTCGGATAAGAACCGAGGG  
AAAAGTGACAATGTTCAAAGCGAGGAAGTCGTAAGAAAATGAAGAACTATTGGCGGACGCTCTAAATGCGAACTGATAACGCAAAAG  
AAAGTTGATAAATTAATAAGCTGAGAGGGGTGGCTTGTCTGAACCTGACAAGGCCGATTTATTAACGTCAGCTCGTGGAAACCC  
GCCAAATCACAAGCATTTGACAGATACTAGATTCCCGAATGAATACGAAAATACGACGAGAACGATAAGCTGATTCCGGGAAGTCAAA  
GTAATCACTTTAAAGTCAAATTTGGTGTGCGACTTCAGAAAAGGATTTTCAATTTATAAAGTTAGGGAGATAAAATACTACCACCATGC  
GCACGACGCTTATCTTAATGCCGTCGTAGGGACCGCACTCATTAAAGAAATACCCGAAGCTAGAAAGTGAGTTTGTGTATGGTGATTACA  
AAGTTTATGACGTCCTGATGATCGCGAAAAGCGAACAGGAGATAGGCAAGGCTACAGCCAAATACTTCTTTTATTCTAACATTATG  
AATTTCTTAAAGACGGAATCACTCTGGCAAACGGAGAGATACGCAAACGACCTTAAATTTGAAACCAATGGGGAGACAGGTGAAATCGT  
ATGGGATAAGGGCCGGACTTCGCGACGGTGAGAAAAGTTTTGTCCATGCCCAAGTCAACATAGTAAAGAAAATGAGGTGCAGACCCG  
GAGGTTTTTCAAAGGAATCGATTCTTCCAAAAAGGAATAGTGATAAGCTCATGCTCGTAAAAAGGACTGGGACCCGCAAAAAACCGT  
GGCTTCGATAGCCCTACAGTTGCTATTCTGTCTAGTAGTGCAAAAAGTTGAGAAGGGAAAATCCAAGAACTGAAGTCAGTCAAAGA  
ATTATTGGGATAACGATTATGGAGCGCTCGTCTTTTGAAGAAGACCCATCGACTTCTTTGAGGCGAAAGGTTACAAGGAAGTAAAA  
AGGATCTCATAATTAACCTACCAAAGTATAGTCTGTTTGTAGTTAGAAAATGGCCGAAAACGGATGTTGGCTAGCGCCGAGAGCTCAA  
AAGGGGAACGAACTCGCACTACCGTCTAAATACGTGAATTTCTGTATTTAGCGTCCATTACGAGAAGTTGAAAGGTTACCTGAAGAT  
AACGAACAGAAGCAACTTTTTGTTGAGCAGCACAAACATTATCTCGACGAAATCATAGAGCAAATTTCCGAATTCAGTAAGAGAGTCAT  
CCTAGCTGATGCCAATCTGGACAAAAGTATTAAGCGCATACAACAAGCAGGGATAAAACCCATACGTGACGAGCGGAAAAATATTATCC  
ATTTGTTTACTCTTACCAACCTCGCGCTCCAGCCGATTCAGTATTTTGCACACAACGATAGATCGCAAACGATACACTTCTACCAAGG  
AGGTGCTAGACGCGACTGATTACCAATCCATCACGGATTATATGAAACTCGGATAGATTTGTACAGCTTGGGGTGACTctgtggtt  
ctACTAATCTGTGAGATATTATTGAAAAGGAGACCGGTAAGCAACTGGTTATCCAGGAATCCATCCTCATGCTCCAGAGGAGGTGGAAG  
AAGTCATTGGGAACAAGCCGAAAAGCGATATACTCGTGCACACCCCTACGACGAGAGCACCAGCAGAAATGTCATGCTTCTGACTAGCG  
ACGCCCTGAATACAAGCTTTGGCTCTGGTCATACAGGATGCAACGGTGAAGAAAGATTAAGATGCTCctgtggttctCCCAAGAAGA  
AGAGGAAAAGTCgggcccGAGGGCAGAGGAAGCTGTCTAACATGCGGTGAGCTGAGGAGAAATCCTGGCCCAACTAATCTGTGAGATATTAT  
TGAAAAGGAGACCGGTAAGCAACTGGTTATCCAGGAATCCATCCTCATGCTCCAGAGGAGGTGGAAGAAGTCAATGGGAACAAGCCGG  
AAAGCGATATACTCGTGCACACCCCTACGACGAGAGCACCAGCAGAAATGTCATGCTTCTGACTAGCGACGCCCTGAATACAAGCCTT  
GGGCTCTGGTATACAGGATAGCAACGGTGAAGACAAGATTAAGATGCTCCCAAGAAGAAGAGGAAAGTCGCTACTAAGCTTACGCTG  
CTGAAGCAGGCTGGAGACGTTGGAGGAGAACCTTGGACCTACCAACCTGTCCGATATCATTGAGAAAAGAGACCCGCAACAGCTGGTGATC  
CAGGAGAGCATCCTGATGCTGCCGAAGAGGTGGAGGAAGTGTACGGCAACAAGCCGAGTCCGACATCCTGGTGCACACAGCCTATGAT  
GAATCCACCGACGAGAACGATGCTGCTGACTCCGATGCTCCGAGTATAAACCCTGGCACTGGTGATCCAGGACTCTAATGGAGAG  
AACAAGATCAAGATGCTGCCAAGAAGAAGAGGAAAGTCAAGGACGGGGCTCCTCTGACCTGTGGCGATGTGGAAGAGAACCCCGG  
CCCCACAAACCTCAGTGACATTATCGAGAAGGAAACAGGAAAACAGCTCGTCATTCAAGAATCTATTCTTATGTTGCTGAGGAAGTCA  
AGAGGTTATTGGCAATAAACCTGAATCTGATATTCTTGTCCATACCGCTACGATGAGTCCACAGATGAAAAATGTTATGCTGCTCACATC  
TGACGCACCAGAGTACAAAACCTGGGCGCTCGTTATTCAAGATTCCAACGGCGAAAAACAAAATCAAATGCTTctgtggttctCCTAAAAA  
AAAAAGAAAGGTGTGA

Sequences for APOBEC1, nCas9, UGI , NLS, Flag and 2A are labeled in red, brown, blue, black, purple and cyan, respectively. The initiation and stop codons are highlighted in bold and sequences for linker peptides are indicated in lower case.
